# Supplementary material for: Distinct ionic adsorption sites in defective Prussian blue: a 3D-RISM study
Source: Royal Society of Chemistry journal article supplement (doi:10.1039/c9cp04355a), 2019-01-01
Supplement: c9cp04355a1.pdf [file c9cp04355a1.pdf]

## Supporting Information

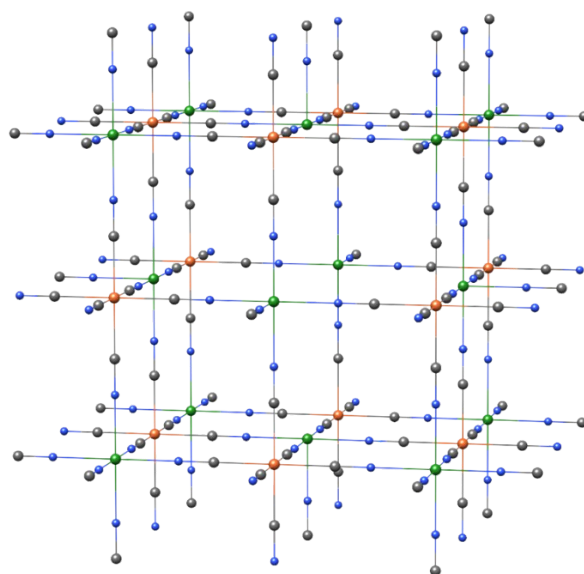

Figure S1. Defective Prussian blue (d-PB) with added cyanide ligand. The  $\text{Fe}^{\text{III}}$  ion is presented in green,  $\text{Fe}^{\text{II}}$  in orange, C in grey and N in blue. Those added ligand were removed before performing the 3D-RISM calculation.

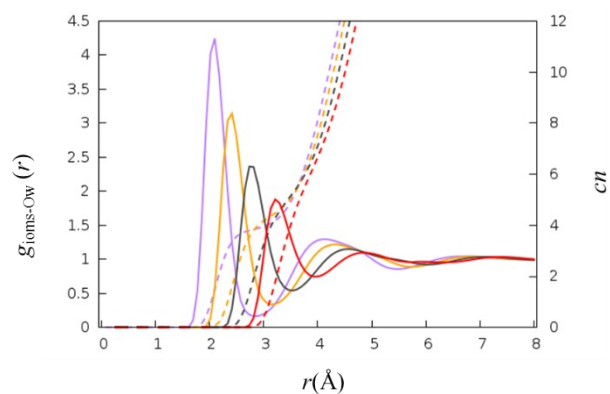

Fig. S2 Radial distribution functions (RDF) between oxygen of bulk water ( $\text{O}_w$ ) and all cation species (full lines),  $\text{Li}^+$  shown in pink,  $\text{Na}^+$  in orange,  $\text{K}^+$  in grey, and  $\text{Cs}^+$  in red. The coordination number ( $cn$ ) of each ion species is indicated by a dashed line with the same defined colour.

Table S1. Atomic coordinates and ESP charges from B3LYP/6-31G(d) level of theory.

| No. | Atom | Coordinate (Å) |        |        | ESP Charge (a.u.) |
|-----|------|----------------|--------|--------|-------------------|
|     |      | x              | y      | z      |                   |
| 1   | Fe   | -5.083         | -5.083 | -5.083 | -0.2564           |
| 2   | Fe   | -5.083         | -5.083 | 0.000  | -2.1587           |
| 3   | Fe   | -5.083         | -5.083 | 5.083  | -0.2564           |
| 4   | Fe   | -5.083         | 0.000  | -5.083 | -2.1105           |
| 5   | Fe   | -5.083         | 0.000  | 0.000  | 1.7042            |
| 6   | Fe   | -5.083         | 0.000  | 5.083  | -2.1105           |
| 7   | Fe   | -5.083         | 5.083  | -5.083 | -0.2564           |
| 8   | Fe   | -5.083         | 5.083  | 0.000  | -2.1587           |
| 9   | Fe   | -5.083         | 5.083  | 5.083  | -0.2564           |
| 10  | Fe   | 0.000          | -5.083 | -5.083 | -2.1360           |
| 11  | Fe   | 0.000          | -5.083 | 0.000  | 1.7074            |
| 12  | Fe   | 0.000          | -5.083 | 5.083  | -2.1360           |
| 13  | Fe   | 0.000          | 0.000  | -5.083 | 1.5468            |
| 14  | Fe   | 0.000          | 0.000  | 5.083  | 1.5468            |
| 15  | Fe   | 0.000          | 5.083  | -5.083 | -2.1360           |
| 16  | Fe   | 0.000          | 5.083  | 0.000  | 1.7074            |
| 17  | Fe   | 0.000          | 5.083  | 5.083  | -2.1360           |
| 18  | Fe   | 5.083          | -5.083 | -5.083 | -0.2564           |
| 19  | Fe   | 5.083          | -5.083 | 0.000  | -2.1587           |
| 20  | Fe   | 5.083          | -5.083 | 5.083  | -0.2564           |
| 21  | Fe   | 5.083          | 0.000  | -5.083 | -2.1105           |
| 22  | Fe   | 5.083          | 0.000  | 0.000  | 1.7042            |
| 23  | Fe   | 5.083          | 0.000  | 5.083  | -2.1105           |
| 24  | Fe   | 5.083          | 5.083  | -5.083 | -0.2564           |
| 25  | Fe   | 5.083          | 5.083  | 0.000  | -2.1587           |
| 26  | Fe   | 5.083          | 5.083  | 5.083  | -0.2564           |
| 27  | C    | -5.083         | -5.083 | -1.923 | 0.2428            |
| 28  | C    | -5.083         | -5.083 | 1.923  | 0.2428            |
| 29  | C    | -5.083         | -3.160 | 0.000  | 0.9015            |
| 30  | C    | -5.083         | -1.923 | -5.083 | 0.2347            |
| 31  | C    | -5.083         | -1.923 | 5.083  | 0.2347            |
| 32  | C    | -5.083         | 0.000  | -3.160 | 0.8860            |
| 33  | C    | -5.083         | 0.000  | 3.160  | 0.8860            |
| 34  | C    | -5.083         | 1.923  | -5.083 | 0.2347            |
| 35  | C    | -5.083         | 1.923  | 5.083  | 0.2347            |
| 36  | C    | -5.083         | 3.160  | 0.000  | 0.9015            |
| 37  | C    | -5.083         | 5.083  | -1.923 | 0.2428            |
| 38  | C    | -5.083         | 5.083  | 1.923  | 0.2428            |

|    |   |        |        |        |        |
|----|---|--------|--------|--------|--------|
| 39 | C | -3.160 | -5.083 | 0.000  | 0.9010 |
| 40 | C | -3.160 | 0.000  | -5.083 | 0.8637 |
| 41 | C | -3.160 | 0.000  | 5.083  | 0.8637 |

Table S1 (continued)

| No. | Atom | Coordinate (Å) |        |        | ESP Charge (a.u.) |
|-----|------|----------------|--------|--------|-------------------|
|     |      | x              | y      | z      |                   |
| 42  | C    | -3.160         | 5.083  | 0.000  | 0.9010            |
| 43  | C    | -1.923         | -5.083 | -5.083 | 0.2399            |
| 44  | C    | -1.923         | -5.083 | 5.083  | 0.2399            |
| 45  | C    | -1.923         | 5.083  | -5.083 | 0.2399            |
| 46  | C    | -1.923         | 5.083  | 5.083  | 0.2399            |
| 47  | C    | 0.000          | -5.083 | -3.160 | 0.8899            |
| 48  | C    | 0.000          | -5.083 | 3.160  | 0.8899            |
| 49  | C    | 0.000          | -3.160 | -5.083 | 0.8851            |
| 50  | C    | 0.000          | -3.160 | 5.083  | 0.8851            |
| 51  | C    | 0.000          | 3.160  | -5.083 | 0.8851            |
| 52  | C    | 0.000          | 3.160  | 5.083  | 0.8851            |
| 53  | C    | 0.000          | 5.083  | -3.160 | 0.8899            |
| 54  | C    | 0.000          | 5.083  | 3.160  | 0.8899            |
| 55  | C    | 1.923          | -5.083 | -5.083 | 0.2399            |
| 56  | C    | 1.923          | -5.083 | 5.083  | 0.2399            |
| 57  | C    | 1.923          | 5.083  | -5.083 | 0.2399            |
| 58  | C    | 1.923          | 5.083  | 5.083  | 0.2399            |
| 59  | C    | 3.160          | -5.083 | 0.000  | 0.9010            |
| 60  | C    | 3.160          | 0.000  | -5.083 | 0.8637            |
| 61  | C    | 3.160          | 0.000  | 5.083  | 0.8637            |
| 62  | C    | 3.160          | 5.083  | 0.000  | 0.9010            |
| 63  | C    | 5.083          | -5.083 | -1.923 | 0.2428            |
| 64  | C    | 5.083          | -5.083 | 1.923  | 0.2428            |
| 65  | C    | 5.083          | -3.160 | 0.000  | 0.9015            |
| 66  | C    | 5.083          | -1.923 | -5.083 | 0.2347            |
| 67  | C    | 5.083          | -1.923 | 5.083  | 0.2347            |
| 68  | C    | 5.083          | 0.000  | -3.160 | 0.8860            |
| 69  | C    | 5.083          | 0.000  | 3.160  | 0.8860            |
| 70  | C    | 5.083          | 1.923  | -5.083 | 0.2347            |
| 71  | C    | 5.083          | 1.923  | 5.083  | 0.2347            |
| 72  | C    | 5.083          | 3.160  | 0.000  | 0.9015            |
| 73  | C    | 5.083          | 5.083  | -1.923 | 0.2428            |
| 74  | C    | 5.083          | 5.083  | 1.923  | 0.2428            |
| 75  | C*   | 7.006          | 0.000  | 5.083  | 0.9315            |
| 76  | C*   | 5.083          | 0.000  | 7.006  | 0.9306            |

|    |     |       |       |        |         |
|----|-----|-------|-------|--------|---------|
| 77 | C * | 8.243 | 5.083 | -5.083 | -1.2970 |
| 78 | C * | 5.083 | 8.243 | -5.083 | -1.2973 |
| 79 | C * | 5.083 | 5.083 | -8.243 | -1.2829 |
| 80 | C * | 5.083 | 5.083 | 8.243  | -1.2829 |
| 81 | C * | 5.083 | 8.243 | 5.083  | -1.2973 |
| 82 | C * | 8.243 | 5.083 | 5.083  | -1.2970 |

Table S1 (continued)

| No. | Atom | Coordinate (Å) |        |        | ESP Charge (a.u.) |
|-----|------|----------------|--------|--------|-------------------|
|     |      | x              | y      | z      |                   |
| 83  | C *  | 7.006          | 5.083  | 0.000  | 0.9426            |
| 84  | C *  | 5.083          | 7.006  | 0.000  | 0.9427            |
| 85  | C *  | 8.243          | 0.000  | 0.000  | -0.7388           |
| 86  | C *  | 5.083          | 0.000  | -7.006 | 0.9306            |
| 87  | C *  | 7.006          | 0.000  | -5.083 | 0.9315            |
| 88  | C *  | 5.083          | -5.083 | 8.243  | -1.2829           |
| 89  | C *  | 5.083          | -8.243 | 5.083  | -1.2973           |
| 90  | C *  | 8.243          | -5.083 | 5.083  | -1.2970           |
| 91  | C *  | 5.083          | -7.006 | 0.000  | 0.9427            |
| 92  | C *  | 7.006          | -5.083 | 0.000  | 0.9426            |
| 93  | C *  | 5.083          | -5.083 | -8.243 | -1.2829           |
| 94  | C *  | 5.083          | -8.243 | -5.083 | -1.2973           |
| 95  | C *  | 8.243          | -5.083 | -5.083 | -1.2970           |
| 96  | C *  | 0.000          | 5.083  | 7.006  | 0.9336            |
| 97  | C *  | 0.000          | 7.006  | 5.083  | 0.9391            |
| 98  | C *  | 0.000          | 8.243  | 0.000  | -0.7356           |
| 99  | C *  | 0.000          | 5.083  | -7.006 | 0.9336            |
| 100 | C *  | 0.000          | 7.006  | -5.083 | 0.9391            |
| 101 | C *  | 0.000          | 0.000  | 8.243  | -0.7841           |
| 102 | C *  | 0.000          | 0.000  | -8.243 | -0.7841           |
| 103 | C *  | 0.000          | -5.083 | 7.006  | 0.9336            |
| 104 | C *  | 0.000          | -7.006 | 5.083  | 0.9391            |
| 105 | C *  | 0.000          | -8.243 | 0.000  | -0.7356           |
| 106 | C *  | 0.000          | -5.083 | -7.006 | 0.9336            |
| 107 | C *  | 0.000          | -7.006 | -5.083 | 0.9391            |
| 108 | C *  | -5.083         | 5.083  | 8.243  | -1.2829           |
| 109 | C *  | -5.083         | 7.006  | 0.000  | 0.9427            |
| 110 | C *  | -5.083         | 8.243  | 5.083  | -1.2973           |
| 111 | C *  | -8.243         | 5.083  | 5.083  | -1.2970           |
| 112 | C *  | -5.083         | -5.083 | -8.243 | -1.2829           |
| 113 | C *  | -5.083         | -8.243 | -5.083 | -1.2973           |
| 114 | C *  | -8.243         | -5.083 | -5.083 | -1.2970           |

|     |     |        |        |        |         |
|-----|-----|--------|--------|--------|---------|
| 115 | C * | -7.006 | -5.083 | 0.000  | 0.9426  |
| 116 | C * | -5.083 | -5.083 | 8.243  | -1.2829 |
| 117 | C * | -5.083 | -8.243 | 5.083  | -1.2973 |
| 118 | C * | -8.243 | -5.083 | 5.083  | -1.2970 |
| 119 | C * | -5.083 | 0.000  | -7.006 | 0.9306  |
| 120 | C * | -7.006 | 0.000  | -5.083 | 0.9315  |
| 121 | C * | -8.243 | 0.000  | 0.000  | -0.7388 |
| 122 | C * | -5.083 | 0.000  | 7.006  | 0.9306  |
| 123 | C * | -7.006 | 0.000  | 5.083  | 0.9315  |

Table S1 (continued)

| No. | Atom | Coordinate (Å) |        |        | ESP Charge (a.u.) |
|-----|------|----------------|--------|--------|-------------------|
|     |      | x              | y      | z      |                   |
| 124 | C *  | -5.083         | 5.083  | -8.243 | -1.2829           |
| 125 | C *  | -5.083         | 8.243  | -5.083 | -1.2973           |
| 126 | C *  | -8.243         | 5.083  | -5.083 | -1.2970           |
| 127 | C *  | -5.083         | -7.006 | 0.000  | 0.9427            |
| 128 | C *  | -7.006         | 5.083  | 0.000  | 0.9426            |
| 129 | N    | -5.083         | -5.083 | -3.054 | -0.0333           |
| 130 | N    | -5.083         | -5.083 | 3.054  | -0.0333           |
| 131 | N    | -5.083         | -3.054 | -5.083 | -0.0307           |
| 132 | N    | -5.083         | -3.054 | 5.083  | -0.0307           |
| 133 | N    | -5.083         | -2.029 | 0.000  | -0.8976           |
| 134 | N    | -5.083         | 0.000  | -2.029 | -0.8971           |
| 135 | N    | -5.083         | 0.000  | 2.029  | -0.8971           |
| 136 | N    | -5.083         | 2.029  | 0.000  | -0.8976           |
| 137 | N    | -5.083         | 3.054  | -5.083 | -0.0307           |
| 138 | N    | -5.083         | 3.054  | 5.083  | -0.0307           |
| 139 | N    | -5.083         | 5.083  | -3.054 | -0.0333           |
| 140 | N    | -5.083         | 5.083  | 3.054  | -0.0333           |
| 141 | N    | -3.054         | -5.083 | -5.083 | -0.0325           |
| 142 | N    | -3.054         | -5.083 | 5.083  | -0.0325           |
| 143 | N    | -3.054         | 5.083  | -5.083 | -0.0325           |
| 144 | N    | -3.054         | 5.083  | 5.083  | -0.0325           |
| 145 | N    | -2.029         | -5.083 | 0.000  | -0.8963           |
| 146 | N    | -2.029         | 0.000  | -5.083 | -0.8490           |
| 147 | N    | -2.029         | 0.000  | 5.083  | -0.8490           |
| 148 | N    | -2.029         | 5.083  | 0.000  | -0.8963           |
| 149 | N    | 0.000          | -5.083 | -2.029 | -0.8968           |
| 150 | N    | 0.000          | -5.083 | 2.029  | -0.8968           |
| 151 | N    | 0.000          | -2.029 | -5.083 | -0.8755           |
| 152 | N    | 0.000          | -2.029 | 5.083  | -0.8755           |

|     |   |       |        |        |         |
|-----|---|-------|--------|--------|---------|
| 153 | N | 0.000 | 2.029  | -5.083 | -0.8755 |
| 154 | N | 0.000 | 2.029  | 5.083  | -0.8755 |
| 155 | N | 0.000 | 5.083  | -2.029 | -0.8968 |
| 156 | N | 0.000 | 5.083  | 2.029  | -0.8968 |
| 157 | N | 2.029 | -5.083 | 0.000  | -0.8963 |
| 158 | N | 2.029 | 0.000  | -5.083 | -0.8490 |
| 159 | N | 2.029 | 0.000  | 5.083  | -0.8490 |
| 160 | N | 2.029 | 5.083  | 0.000  | -0.8963 |
| 161 | N | 3.054 | -5.083 | -5.083 | -0.0325 |
| 162 | N | 3.054 | -5.083 | 5.083  | -0.0325 |
| 163 | N | 3.054 | 5.083  | -5.083 | -0.0325 |
| 164 | N | 3.054 | 5.083  | 5.083  | -0.0325 |

Table S1 (continued)

| No. | Atom | Coordinate (Å) |        |        | ESP Charge (a.u.) |
|-----|------|----------------|--------|--------|-------------------|
|     |      | x              | y      | z      |                   |
| 165 | N    | 5.083          | -5.083 | -3.054 | -0.0333           |
| 166 | N    | 5.083          | -5.083 | 3.054  | -0.0333           |
| 167 | N    | 5.083          | -3.054 | -5.083 | -0.0307           |
| 168 | N    | 5.083          | -3.054 | 5.083  | -0.0307           |
| 169 | N    | 5.083          | -2.029 | 0.000  | -0.8976           |
| 170 | N    | 5.083          | 0.000  | -2.029 | -0.8971           |
| 171 | N    | 5.083          | 0.000  | 2.029  | -0.8971           |
| 172 | N    | 5.083          | 2.029  | 0.000  | -0.8976           |
| 173 | N    | 5.083          | 3.054  | -5.083 | -0.0307           |
| 174 | N    | 5.083          | 3.054  | 5.083  | -0.0307           |
| 175 | N    | 5.083          | 5.083  | -3.054 | -0.0333           |
| 176 | N    | 5.083          | 5.083  | 3.054  | -0.0333           |
| 177 | N *  | 5.083          | 5.083  | -7.112 | 0.4886            |
| 178 | N *  | 5.083          | 8.137  | 0.000  | -0.9903           |
| 179 | N *  | 5.083          | 5.083  | 7.112  | 0.4886            |
| 180 | N *  | 7.112          | 5.083  | 5.083  | 0.4929            |
| 181 | N *  | 5.083          | 7.112  | 5.083  | 0.4931            |
| 182 | N *  | 8.137          | 5.083  | 0.000  | -0.9908           |
| 183 | N *  | 5.083          | 7.112  | -5.083 | 0.4931            |
| 184 | N *  | 7.112          | 5.083  | -5.083 | 0.4929            |
| 185 | N *  | 5.083          | 0.000  | 8.137  | -0.9916           |
| 186 | N *  | 8.137          | 0.000  | 5.083  | -0.9876           |
| 187 | N *  | 7.112          | 0.000  | 0.000  | 0.2842            |
| 188 | N *  | 5.083          | 0.000  | -8.137 | -0.9916           |
| 189 | N *  | 8.137          | 0.000  | -5.083 | -0.9876           |
| 190 | N *  | 5.083          | -5.083 | 7.112  | 0.4886            |

|     |     |       |        |        |         |
|-----|-----|-------|--------|--------|---------|
| 191 | N * | 5.083 | -7.112 | 5.083  | 0.4931  |
| 192 | N * | 7.112 | -5.083 | 5.083  | 0.4929  |
| 193 | N * | 5.083 | -8.137 | 0.000  | -0.9903 |
| 194 | N * | 8.137 | -5.083 | 0.000  | -0.9908 |
| 195 | N * | 5.083 | -5.083 | -7.112 | 0.4886  |
| 196 | N * | 5.083 | -7.112 | -5.083 | 0.4931  |
| 197 | N * | 7.112 | -5.083 | -5.083 | 0.4929  |
| 198 | N * | 0.000 | 5.083  | 8.137  | -0.9924 |
| 199 | N * | 0.000 | 8.137  | 5.083  | -0.9890 |
| 200 | N * | 0.000 | 7.112  | 0.000  | 0.2832  |
| 201 | N * | 0.000 | 5.083  | -8.137 | -0.9924 |
| 202 | N * | 0.000 | 8.137  | -5.083 | -0.9890 |
| 203 | N * | 0.000 | 0.000  | 7.112  | 0.3093  |
| 204 | N * | 0.000 | 0.000  | -7.112 | 0.3093  |
| 205 | N * | 0.000 | -5.083 | 8.137  | -0.9924 |

Table S1 (continued)

| No. | Atom | Coordinate (Å) |        |        | ESP Charge (a.u.) |
|-----|------|----------------|--------|--------|-------------------|
|     |      | x              | y      | z      |                   |
| 206 | N *  | 0.000          | -8.137 | 5.083  | -0.9890           |
| 207 | N *  | 0.000          | -7.112 | 0.000  | 0.2832            |
| 208 | N *  | 0.000          | -5.083 | -8.137 | -0.9924           |
| 209 | N *  | 0.000          | -8.137 | -5.083 | -0.9890           |
| 210 | N *  | -5.083         | 5.083  | 7.112  | 0.4886            |
| 211 | N *  | -5.083         | 7.112  | 5.083  | 0.4931            |
| 212 | N *  | -7.112         | 5.083  | 5.083  | 0.4929            |
| 213 | N *  | -5.083         | -5.083 | -7.112 | 0.4886            |
| 214 | N *  | -5.083         | -7.112 | -5.083 | 0.4931            |
| 215 | N *  | -7.112         | -5.083 | -5.083 | 0.4929            |
| 216 | N *  | -5.083         | -8.137 | 0.000  | -0.9903           |
| 217 | N *  | -8.137         | -5.083 | 0.000  | -0.9908           |
| 218 | N *  | -5.083         | -5.083 | 7.112  | 0.4886            |
| 219 | N *  | -5.083         | -7.112 | 5.083  | 0.4931            |
| 220 | N *  | -7.112         | -5.083 | 5.083  | 0.4929            |
| 221 | N *  | -5.083         | 0.000  | -8.137 | -0.9916           |
| 222 | N *  | -8.137         | 0.000  | -5.083 | -0.9876           |
| 223 | N *  | -7.112         | 0.000  | 0.000  | 0.2842            |
| 224 | N *  | -5.083         | 0.000  | 8.137  | -0.9916           |
| 225 | N *  | -8.137         | 0.000  | 5.083  | -0.9876           |
| 226 | N *  | -5.083         | 5.083  | -7.112 | 0.4886            |
| 227 | N *  | -5.083         | 7.112  | -5.083 | 0.4931            |
| 228 | N *  | -7.112         | 5.083  | -5.083 | 0.4929            |

|     |     |        |       |       |         |
|-----|-----|--------|-------|-------|---------|
| 229 | N * | -5.083 | 8.137 | 0.000 | -0.9903 |
| 230 | N * | -8.137 | 5.083 | 0.000 | -0.9908 |

\*Removed atoms in 3DRISM calculation
